# Supplementary material
Source: PubMed Central journal article supplement (PMC7259533)

**Supplementary Table 1. Laboratory results of patients with SARS-CoV-2 infection**

|                                              | ①Mild<br>(n=30) | ②Severe<br>(n=20) | ③<br>Extremely<br>severe<br>(n=15) | <i>p</i> value |           |           |
|----------------------------------------------|-----------------|-------------------|------------------------------------|----------------|-----------|-----------|
|                                              |                 |                   |                                    | ① vs<br>②      | ① vs<br>③ | ② vs<br>③ |
| <b>Blood routine</b>                         |                 |                   |                                    |                |           |           |
| Leucocytes (× 10 <sup>9</sup> /L)            | 5.2(2.4)        | 6.9(3.8)          | 8.7(4.1)                           | 0.081          | <0.001    | 0.086     |
| Neutrophils (× 10 <sup>9</sup> /L)           | 3.8(2.4)        | 5.7(3.7)          | 7.7(3.9)                           | 0.020          | <0.001    | 0.060     |
| Lymphocytes (× 10 <sup>9</sup> /L)           | 0.9(0.4)        | 0.8(0.4)          | 0.5(0.2)                           | 0.151          | <0.001    | 0.028     |
| Monocytes (× 10 <sup>9</sup> /L)             | 0.4(0.2)        | 0.4(0.2)          | 0.5(0.4)                           | 0.774          | 0.426     | 0.243     |
| Eosinophils (× 10 <sup>9</sup> /L)           | 0.06(0.08)      | 0.02(0.03)        | 0.03(0.1)                          | 0.062          | 0.046     | 0.763     |
| Basophils (× 10 <sup>9</sup> /L)             | 0.01(0.01)      | 0.01(0.01)        | 0.01(0.01)                         | 0.164          | 0.797     | 0.137     |
| Red blood cells (× 10 <sup>12</sup> /L)      | 4(0.7)          | 4.2(0.5)          | 4.1(0.7)                           | 0.470          | 0.923     | 0.582     |
| Hemoglobin (g/L)                             | 126.6(15.5)     | 129.4(15.8)       | 121.9(18)                          | 0.428          | 0.300     | 0.257     |
| Platelets (× 10 <sup>9</sup> /L)             | 230(82.6)       | 200.7(89)         | 185.9(121.9)                       | 0.188          | 0.075     | 0.377     |
| <b>Biochemistry</b>                          |                 |                   |                                    |                |           |           |
| Alanine aminotransferase<br>(U/L)            | 32.7(24.7)      | 35.1(23.4)        | 52.5(83.9)                         | 0.559          | 0.555     | 0.987     |
| Aspartate aminotransferase<br>(U/L)          | 33.7(20.5)      | 41.7(18.2)        | 43.2(29)                           | 0.111          | 0.185     | 0.764     |
| Total protein (g/L)                          | 69.9(5.2)       | 67.5(7.4)         | 66.4(6)                            | 0.137          | 0.015     | 0.828     |
| Albumin (g/L)                                | 34.2(5.7)       | 32.5(4.5)         | 30.6(5.7)                          | 0.312          | 0.018     | 0.162     |
| Globulin (g/L)                               | 35.6(4.8)       | 35(4.3)           | 35.8(4.6)                          | 0.663          | 0.838     | 0.701     |
| Total bilirubin (μmol/L)                     | 8.5(4.3)        | 9.5(2.4)          | 13.9(6.1)                          | 0.209          | 0.005     | 0.022     |
| γ-glutamyl transpeptidase<br>(U/L)           | 57.5(81.2)      | 47.2(41.8)        | 63.5(46.7)                         | 0.440          | 0.028     | 0.117     |
| Alkaline phosphatase (U/L)                   | 78.5(42.3)      | 64.8(23.3)        | 89.1(35.7)                         | 0.428          | 0.118     | 0.024     |
| Lactate dehydrogenase (U/L)                  | 305.6(103.7)    | 424.1(162.6)      | 542.5(220.9)                       | 0.006          | <0.001    | 0.138     |
| Blood urea nitrogen<br>(mmol/L)              | 3.9(1.9)        | 5.8(3.4)          | 6.4(2.2)                           | 0.016          | <0.001    | 0.257     |
| Serum creatinine (μmol/L)                    | 65.2(21.4)      | 81.9(28.1)        | 69.4(18.8)                         | 0.014          | 0.373     | 0.250     |
| <b>Coagulation function</b>                  |                 |                   |                                    |                |           |           |
| Activated partial<br>thromboplastin time (s) | 39.9(5.4)       | 42.4(7.3)         | 39.7(7.3)                          | 0.294          | 0.674     | 0.205     |
| Prothrombin time (s)                         | 14.1(1)         | 14.3(1.1)         | 15.1(1.9)                          | 0.494          | 0.089     | 0.230     |
| Fibrinogen (g/L)                             | 5.2(1.4)        | 5.8(1.2)          | 7.1(5.8)                           | 0.098          | 0.782     | 0.359     |
| D-dimer (μg/mL)                              | 1.6(3)          | 4.7(7.4)          | 6.9(8.4)                           | 0.081          | <0.001    | 0.086     |
| <b>Infection biomarkers</b>                  |                 |                   |                                    |                |           |           |
| Procalcitonin (ng/ml)                        | 0.1(0.4)        | 0.3(0.6)          | 0.8(1.2)                           | 0.008          | <0.001    | 0.021     |
| C-reactive protein (mg/L)                    | 53.6(57.7)      | 91.8(77.8)        | 114.9(62.5)                        | 0.022          | 0.002     | 0.086     |
| Serum ferritin (ng/mL)                       | 821.1(651.9)    | 1331(1205)        | 1368(638.8)                        | 0.094          | 0.003     | 0.342     |

|                                       |            |            |          |       |       |       |
|---------------------------------------|------------|------------|----------|-------|-------|-------|
| Erythrocyte sedimentation rate (mm/h) | 41.8(24.3) | 48.8(29.1) | 46.2(30) | 0.488 | 0.718 | 0.629 |
|---------------------------------------|------------|------------|----------|-------|-------|-------|

Data are n (%), mean (SD). SARS-CoV-2, severe acute respiratory syndrome coronavirus 2.

**Supplementary Table 2. The normal ranges of laboratory tests**

|                                           | Normal range                        |
|-------------------------------------------|-------------------------------------|
| <b>Blood routine</b>                      |                                     |
| Leucocytes ( $\times 10^9/L$ )            | 3.5-9.5                             |
| Neutrophils ( $\times 10^9/L$ )           | 1.8-6.3                             |
| Lymphocytes ( $\times 10^9/L$ )           | 1.1-3.2                             |
| Monocytes ( $\times 10^9/L$ )             | 0.1-0.6                             |
| Eosinophils ( $\times 10^9/L$ )           | 0.02-0.52                           |
| Basophils ( $\times 10^9/L$ )             | 0-0.1                               |
| Red blood cell ( $\times 10^{12}/L$ )     | Male: 4.3-5.8; Female: 3.8-5.1      |
| Hemoglobin (g/L)                          | Male: 130-175; Female: 115-150      |
| Platelets ( $\times 10^9/L$ )             | 125-350                             |
| <b>Blood biochemistry</b>                 |                                     |
| Alanine aminotransferase (U/L)            | Male: $\leq 41$ ; Female: $\leq 32$ |
| Aspartate aminotransferase (U/L)          | Male: $\leq 40$ ; Female: $\leq 32$ |
| Total protein (g/L)                       | 65-85 g/L                           |
| Albumin (g/L)                             | 35-52 g/L                           |
| Globulin(g/L)                             | 20-35 g/L                           |
| $\gamma$ -glutamyl transpeptidase (U/L)   | Male: 10-71; Female: 6-42           |
| Alkaline phosphatase (U/L)                | Male: 40-130; Female: 35-105        |
| Total bilirubin ( $\mu\text{mol/L}$ )     | Male: $\leq 26$ ; Female: $\leq 21$ |
| Lactate dehydrogenase (U/L)               | Male: 135-225; Female: 135-214      |
| Blood urea nitrogen (mmol/L)              | Male: 3.1-8; Female: 2.6-7.5        |
| Serum creatinine ( $\mu\text{mol/L}$ )    | Male: 59-104; Female: 45-84         |
| <b>Coagulation function</b>               |                                     |
| Activated partial thromboplastin time (s) | 34-47                               |
| Prothrombin time (s)                      | 12-14.5                             |
| Fibrinogen (g/L)                          | 1.8-4                               |
| D-dimer ( $\mu\text{g/mL}$ )              | $<0.5$                              |
| <b>Infection-related biomarkers</b>       |                                     |
| Procalcitonin (ng/ml)                     | $<0.05$                             |
| C-reactive protein (mg/L)                 | $<1$                                |
| Serum ferritin (ng/mL)                    | Male: 30-400; Female: 15-150        |
| Erythrocyte sedimentation rate (mm/h)     | Male: $\leq 15$ ; Female: $\leq 20$ |

Supplementary Figure 1. (A) Gating strategies for HLA-DR and CD28 expression on CD4<sup>+</sup> and CD8<sup>+</sup> T cells.

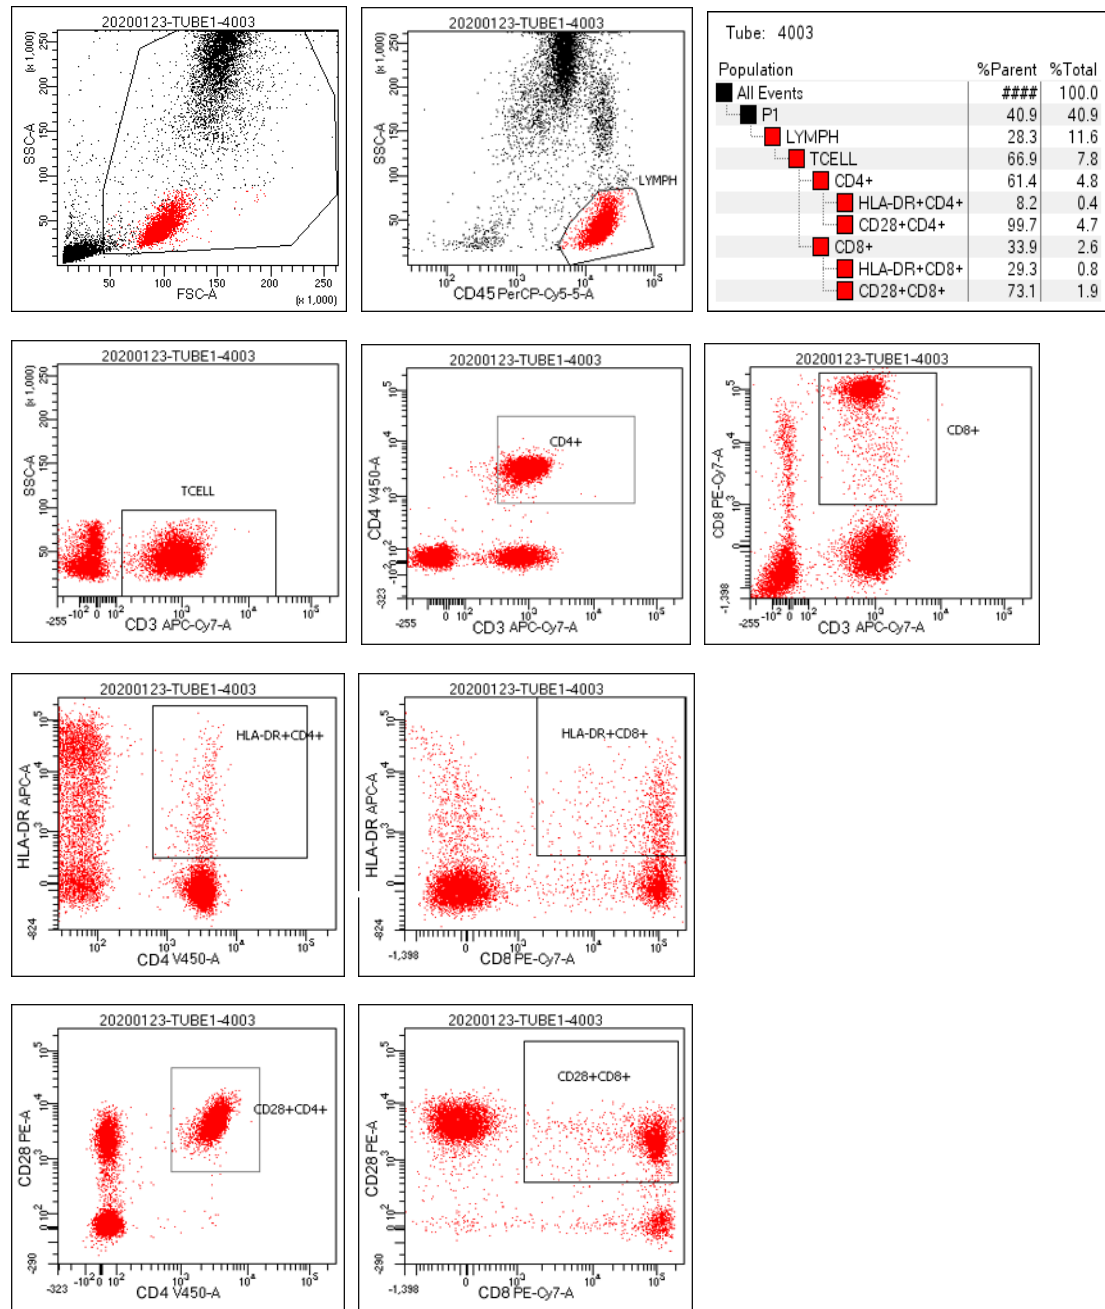

Supplementary Figure 1. (B) Gating strategies for Treg, and CD45RA and CD45RO expression on CD4<sup>+</sup> T cells.

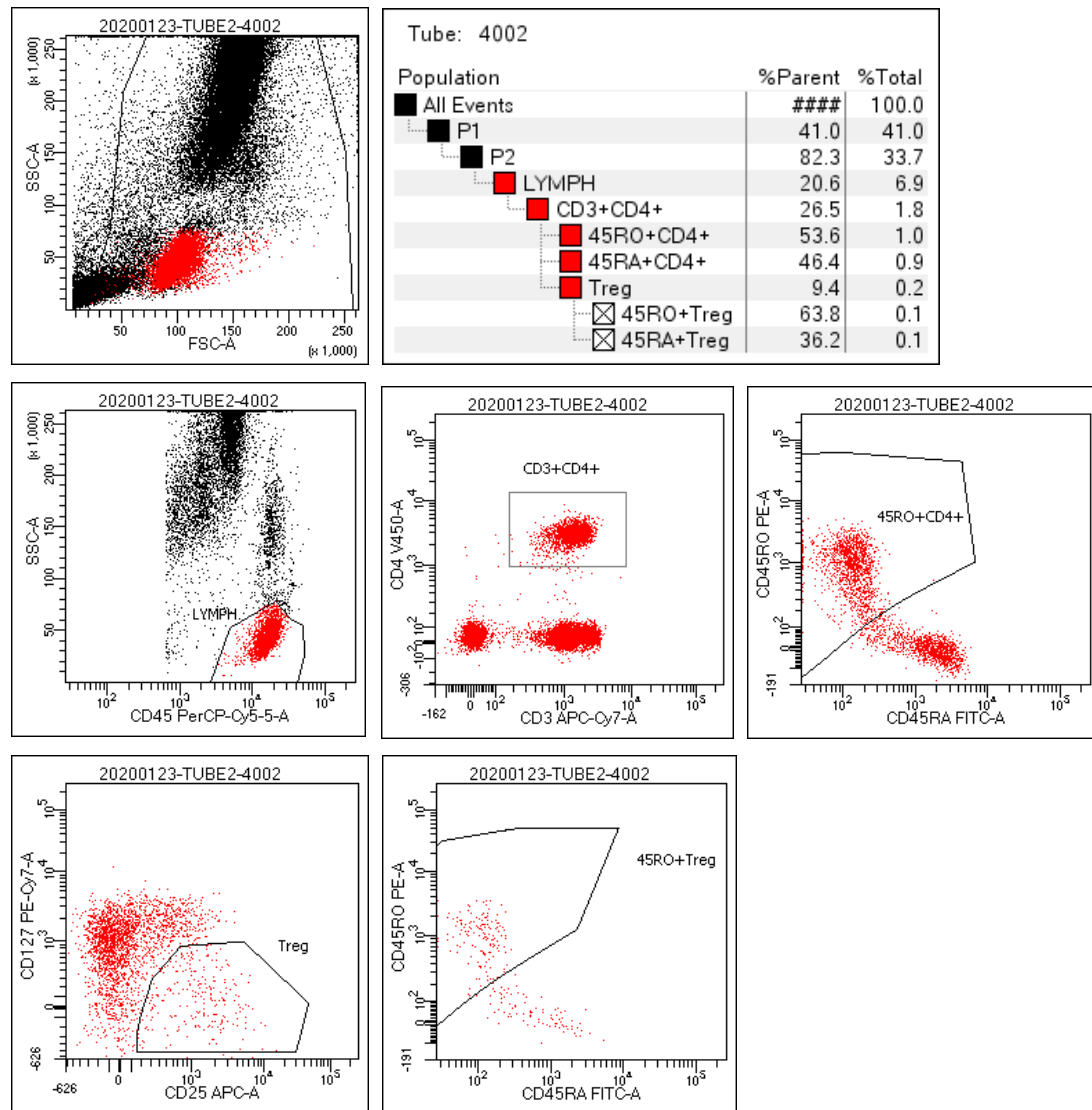

Supplementary Figure 1. (C) Gating strategies for lymphocyte function (IFN- $\gamma$  expression in CD4<sup>+</sup> T cells, CD8<sup>+</sup> T cells and NK cells after PMA/ionomycin stimulation).

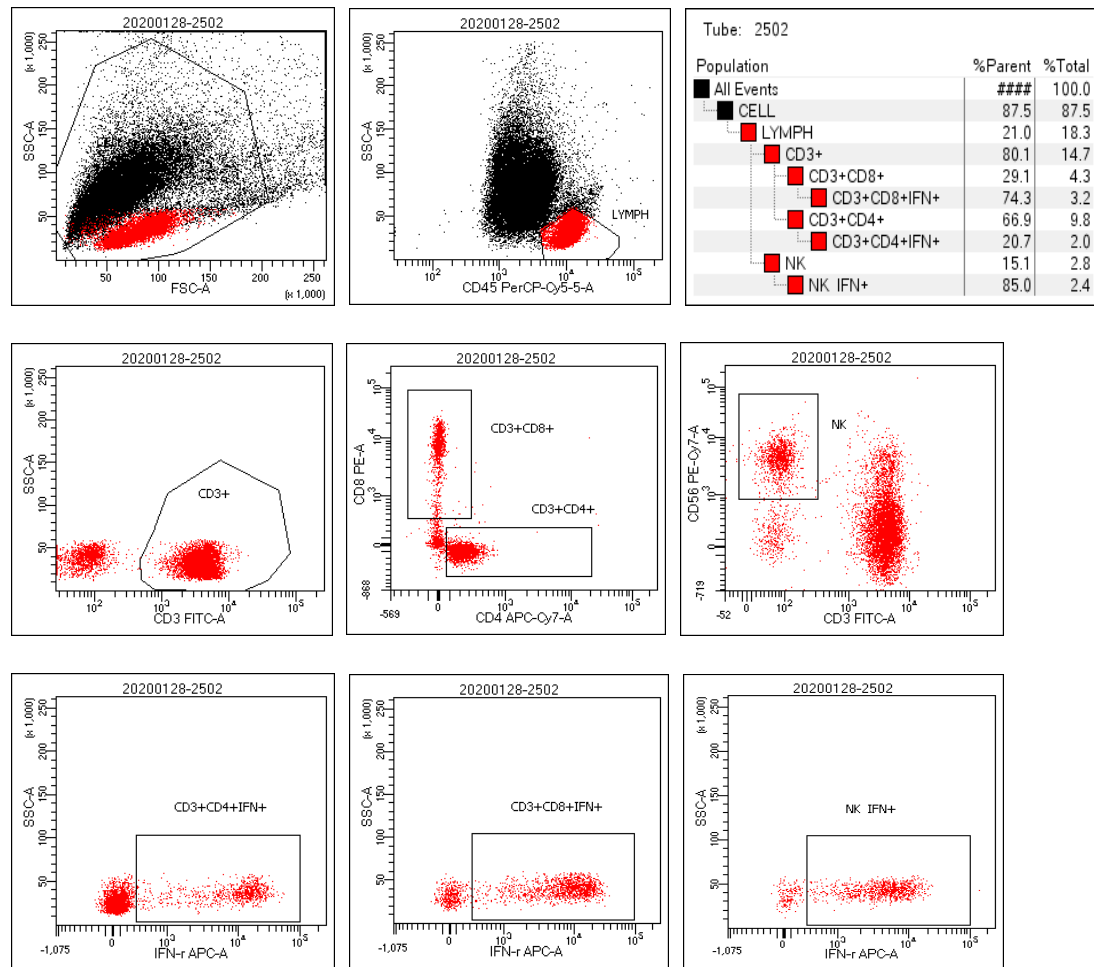

Supplementary Figure 1. (D) Gating strategies for identification of DC.

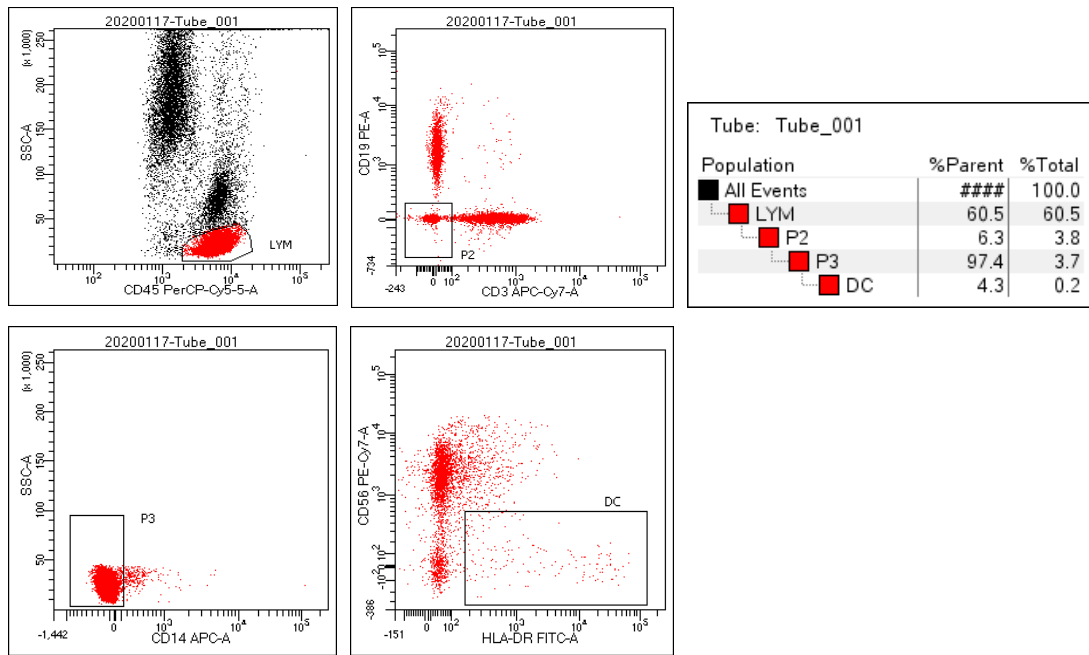

Supplementary Figure 1. (E) Gating strategies for identification of B cell subsets.

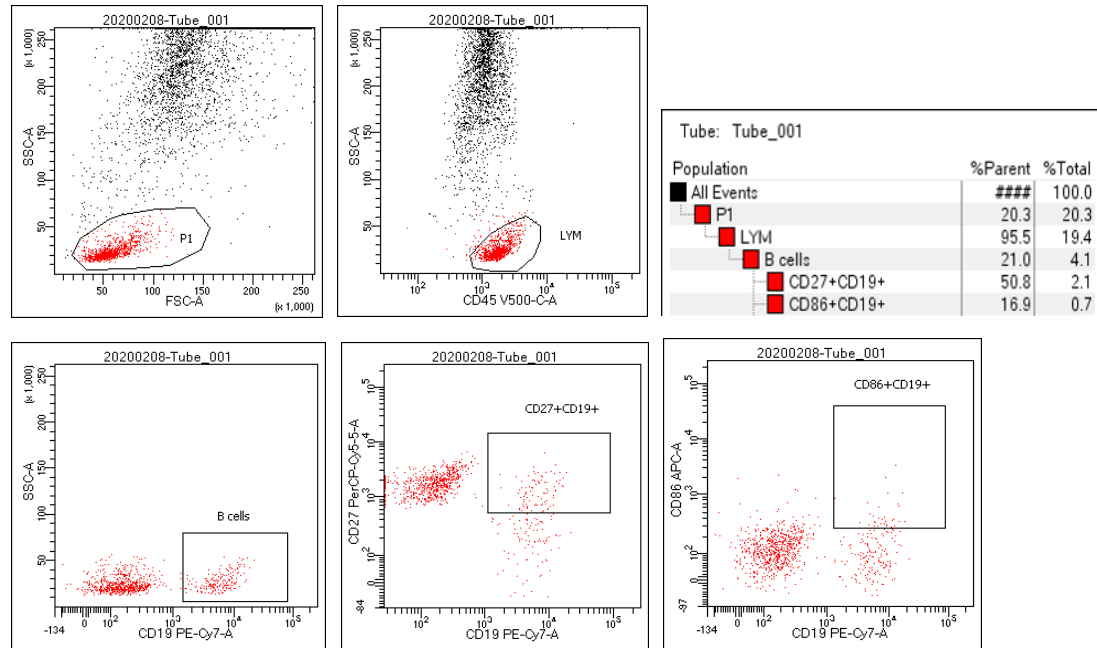

Supplementary Figure 1. (F) Gating strategies for PD-1 and Tim-3 expression on CD4<sup>+</sup> and CD8<sup>+</sup> T cells.

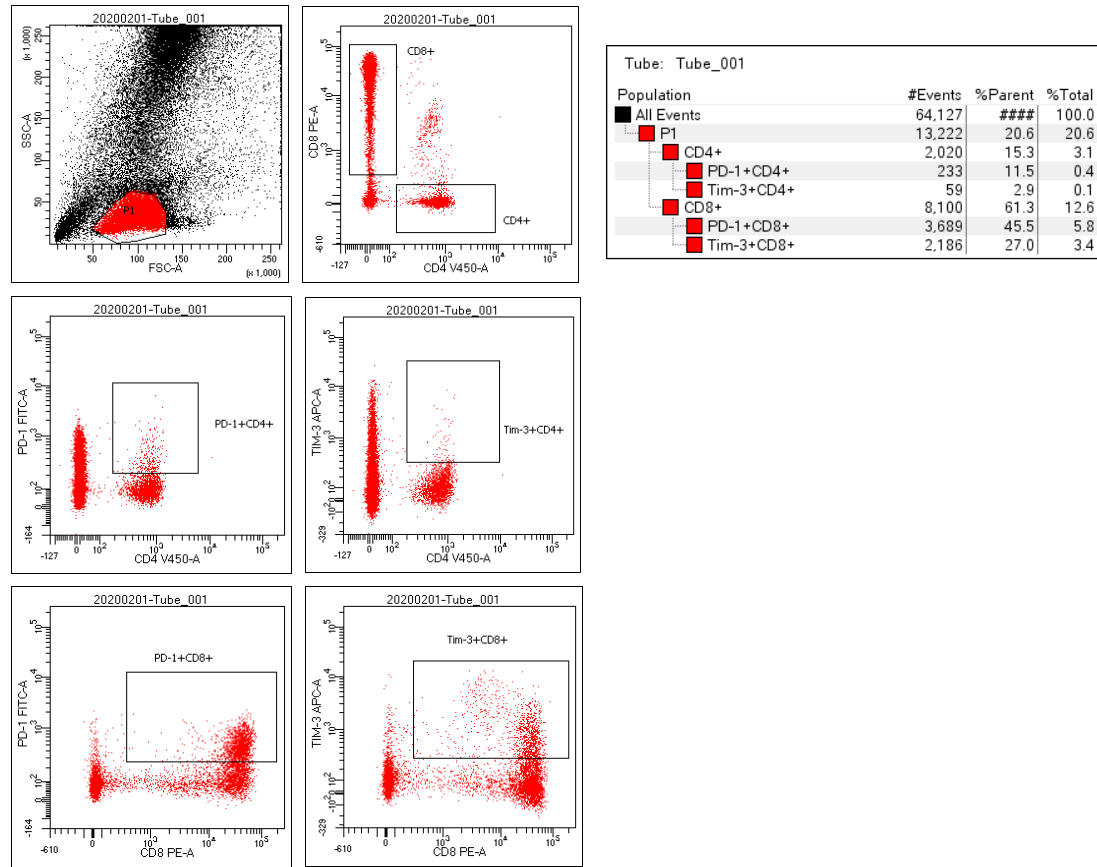

Supplement: jciinsight-5-137799-s134.pdf [file jciinsight-5-137799-s134.pdf]
